# Supplementary material for: High correlation of Middle East respiratory syndrome spread with Google search and Twitter trends in Korea
Source: PubMed Central journal article supplement (PMC5011762; doi:10.1038/srep32920), 2016-09-06
Supplement: srep32920-s1.pdf [file srep32920-s1.pdf]

## **High correlation of Middle East respiratory syndrome spread with Google search and Twitter trends in Korea**

Soo-Yong Shin, PhD<sup>1,\*</sup>, Dong-Woo Seo, MD<sup>2,\*</sup>, Jisun An, PhD<sup>3</sup>, Haewoon Kwak, PhD<sup>3</sup>, Sung-Han Kim, MD<sup>4</sup>, Jin Gwack, MD<sup>5</sup>, Min-Woo Jo, MD<sup>6</sup>

<sup>1</sup>Department of Biomedical Informatics, Asan Medical Center, Seoul, Korea

<sup>2</sup>Department of Emergency Medicine, Asan Medical Center, University of Ulsan College of Medicine, Seoul, Korea

<sup>3</sup>Qatar Computing Research Institute, Hamad Bin Khalifa University, Doha, Qatar

<sup>4</sup>Department of Infectious Diseases, Asan Medical Center, University of Ulsan College of Medicine, Seoul, Korea

<sup>5</sup>Center for Disease Control and Prevention, Osong, Chungbuk, Korea

<sup>6</sup>Department of Preventive Medicine, University of Ulsan College of Medicine, Seoul, Korea

\* These authors contributed equally to this work.

Corresponding author: Min-Woo Jo, MD, PhD

Department of Preventive Medicine, University of Ulsan College of Medicine, 88 Olympic-ro 43  
gil, Songpa-gu, Seoul 05505, Korea

Tel: +82-2-3010-4264

Fax: +82-2-477-2898

E-mail: [mdjominwoo@gmail.com](mailto:mdjominwoo@gmail.com)

Supplementary Table 1. Raw data of queries, new laboratory confirmed cases and quarantined cases.

| Date   | New_<br>confirmed | Quaran-<br>tined | Google search |                   |                               |                               | Twitter |                   |                               |                               |
|--------|-------------------|------------------|---------------|-------------------|-------------------------------|-------------------------------|---------|-------------------|-------------------------------|-------------------------------|
|        |                   |                  | G_MERS        | G_MERS<br>_Korean | G_MERS<br>symptoms_<br>Korean | G_MERS<br>hospital_<br>Korean | T_MERS  | T_MERS<br>_Korean | T_MERS<br>symptoms_<br>Korean | T_MERS<br>hospital_<br>Korean |
| 11-May | 0                 | 0                | 0             | 0                 | 0                             | 0                             | 736     | 1                 | 0                             | 0                             |
| 12-May | 0                 | 0                | 0             | 0                 | 0                             | 0                             | 738     | 5                 | 0                             | 0                             |
| 13-May | 0                 | 0                | 0             | 0                 | 0                             | 0                             | 418     | 1                 | 0                             | 0                             |
| 14-May | 0                 | 0                | 0             | 0                 | 0                             | 0                             | 603     | 3                 | 0                             | 0                             |
| 15-May | 0                 | 0                | 0             | 0                 | 0                             | 0                             | 373     | 4                 | 0                             | 0                             |
| 16-May | 0                 | 0                | 0             | 0                 | 0                             | 0                             | 374     | 2                 | 0                             | 0                             |
| 17-May | 0                 | 0                | 0             | 0                 | 0                             | 0                             | 600     | 9                 | 0                             | 0                             |
| 18-May | 0                 | 0                | 0             | 0                 | 0                             | 0                             | 544     | 1                 | 0                             | 0                             |
| 19-May | 0                 | 0                | 0             | 0                 | 0                             | 0                             | 1087    | 84                | 1                             | 0                             |
| 20-May | 2                 | 3                | 0             | 0                 | 0                             | 0                             | 1711    | 631               | 19                            | 3                             |
| 21-May | 1                 | 64               | 0             | 3                 | 0                             | 0                             | 1425    | 619               | 50                            | 9                             |
| 22-May | 0                 | 0                | 2             | 1                 | 0                             | 0                             | 1007    | 119               | 7                             | 5                             |
| 23-May | 0                 | 0                | 2             | 1                 | 0                             | 0                             | 481     | 112               | 30                            | 1                             |
| 24-May | 0                 | 0                | 2             | 1                 | 0                             | 0                             | 552     | 86                | 34                            | 4                             |
| 25-May | 0                 | 0                | 2             | 2                 | 0                             | 0                             | 999     | 984               | 96                            | 83                            |
| 26-May | 2                 | 61               | 2             | 6                 | 0                             | 0                             | 2821    | 1519              | 81                            | 56                            |
| 27-May | 0                 | 0                | 3             | 5                 | 0                             | 0                             | 3652    | 2307              | 116                           | 74                            |
| 28-May | 2                 | 127              | 8             | 10                | 0                             | 15                            | 5876    | 17156             | 1112                          | 1618                          |
| 29-May | 6                 | 129              | 69            | 44                | 14                            | 21                            | 15615   | 25429             | 1083                          | 1542                          |
| 30-May | 2                 | 462              | 30            | 23                | 9                             | 25                            | 11650   | 21000             | 960                           | 1155                          |
| 31-May | 3                 | 715              | 15            | 17                | 12                            | 17                            | 11940   | 31608             | 753                           | 2485                          |
| 01-Jun | 7                 | 789              | 41            | 42                | 14                            | 55                            | 68422   | 151491            | 4629                          | 12847                         |
| 02-Jun | 5                 | 1346             | 91            | 100               | 34                            | 100                           | 99439   | 215940            | 3543                          | 23063                         |
| 03-Jun | 0                 | 1667             | 100           | 95                | 34                            | 92                            | 92846   | 165605            | 3815                          | 14391                         |
| 04-Jun | 6                 | 1820             | 98            | 73                | 32                            | 75                            | 97356   | 180961            | 3213                          | 24275                         |

|        |    |      |    |    |     |    |       |        |      |       |
|--------|----|------|----|----|-----|----|-------|--------|------|-------|
| 05-Jun | 6  | 1866 | 82 | 54 | 100 | 52 | 64182 | 130330 | 3121 | 20499 |
| 06-Jun | 22 | 2361 | 51 | 38 | 56  | 42 | 55031 | 132809 | 2629 | 28492 |
| 07-Jun | 23 | 2508 | 52 | 44 | 54  | 93 | 73464 | 174900 | 6050 | 35538 |
| 08-Jun | 8  | 2892 | 57 | 39 | 65  | 48 | 80942 | 118742 | 1994 | 18080 |
| 09-Jun | 13 | 3493 | 48 | 34 | 40  | 46 | 80686 | 98992  | 1689 | 14448 |
| 10-Jun | 14 | 3805 | 35 | 28 | 45  | 31 | 76577 | 81095  | 1424 | 13604 |
| 11-Jun | 4  | 3680 | 42 | 36 | 49  | 35 | 81867 | 88904  | 1730 | 14500 |
| 12-Jun | 12 | 4014 | 33 | 29 | 27  | 40 | 76244 | 74955  | 1180 | 8224  |
| 13-Jun | 7  | 1856 | 27 | 26 | 31  | 36 | 81169 | 64119  | 1075 | 8450  |
| 14-Jun | 5  | 5216 | 26 | 27 | 44  | 33 | 75017 | 86297  | 1415 | 12376 |
| 15-Jun | 4  | 5586 | 36 | 30 | 32  | 36 | 86543 | 88754  | 1472 | 10193 |
| 16-Jun | 8  | 6508 | 36 | 31 | 36  | 21 | 72566 | 83927  | 1099 | 7962  |
| 17-Jun | 2  | 6729 | 32 | 31 | 44  | 28 | 57311 | 70048  | 956  | 9002  |
| 18-Jun | 2  | 5930 | 28 | 26 | 29  | 20 | 74650 | 67781  | 499  | 9809  |
| 19-Jun | 0  | 5197 | 21 | 21 | 28  | 17 | 61836 | 41851  | 238  | 4304  |
| 20-Jun | 3  | 4035 | 16 | 15 | 15  | 0  | 37784 | 28378  | 78   | 3141  |
| 21-Jun | 3  | 3833 | 14 | 14 | 20  | 0  | 33054 | 35301  | 92   | 4114  |
| 22-Jun | 3  | 2805 | 16 | 13 | 14  | 0  | 30099 | 36025  | 143  | 6280  |
| 23-Jun | 4  | 3103 | 15 | 9  | 12  | 0  | 26619 | 35891  | 189  | 6079  |
| 24-Jun | 1  | 2642 | 15 | 11 | 15  | 0  | 23934 | 32517  | 201  | 3142  |
| 25-Jun | 1  | 2931 | 14 | 9  | 9   | 0  | 18209 | 17715  | 44   | 1334  |
| 26-Jun | 1  | 2467 | 9  | 7  | 12  | 0  | 12869 | 7059   | 242  | 1721  |

Supplementary Table 2. Correlations between the search keywords in Google (A) and tweets on Twitter (B)

(A) Correlations between the search keywords in Google

|                        | G_MERS | G_MERS_Korean | G_MERS symptoms_Korean | G_MERS hospital_Korean |
|------------------------|--------|---------------|------------------------|------------------------|
| G_MERS                 | 1.000  | 0.987         | 0.857                  | 0.880                  |
| G_MERS_Korean          |        | 1.000         | 0.861                  | 0.890                  |
| G_MERS symptoms_Korean |        |               | 1.000                  | 0.792                  |
| G_MERS hospital_Korean |        |               |                        | 1.000                  |

(B) Correlations between the tweets on Twitter

|                        | T_MERS | T_MERS_Korean | T_MERS symptoms_Korean | T_MERS hospital_Korean |
|------------------------|--------|---------------|------------------------|------------------------|
| T_MERS                 | 1.000  | 0.941         | 0.871                  | 0.924                  |
| T_MERS_Korean          |        | 1.000         | 0.946                  | 0.979                  |
| T_MERS symptoms_Korean |        |               | 1.000                  | 0.933                  |
| T_MERS hospital_Korean |        |               |                        | 1.000                  |
